# Supplementary material for: An Early Mediterranean-Based Nutritional Intervention during Pregnancy Reduces Metabolic Syndrome and Glucose Dysregulation Rates at 3 Years Postpartum
Source: MDPI journal article supplement (doi:10.3390/nu15143252), 2023-07-22
Supplement: s1 [file s1]

**Supplementary Table S1.** Clinical and metabolic characteristics during pregnancy of analyzed women.

|                                          | <b>CG N=369</b>     | <b>IG N= 1031</b> | <b>P</b>     |
|------------------------------------------|---------------------|-------------------|--------------|
| <b>WEIGHT GAIN AT 12 GW (Kg)</b>         | 1.9 (0.1–3.3)       | 1.7 (0.3–3.4)     | 0.572        |
| <b>WEIGHT GAIN AT 24-28 GW (Kg)</b>      | 7.3 (5.3–9.7)       | 6.9 (4.7–9.1)     | 0.040        |
| <b>WEIGHT GAIN AT 36-38 GW (Kg)</b>      | 11.2 (8.1–14.1)     | 11.8 (8.8–15.0)   | 0.141        |
| <b>SYSTOLIC BP / DIASTOLIC BP (mmHg)</b> |                     |                   |              |
| <b>AT 12 GW</b>                          | 109 (101–115)       | 108 (101–116)     | 0.889        |
|                                          | 66 (60–73)          | 67 (61–73)        | 0.334        |
| <b>AT 24 GW</b>                          | 104 (97–112)        | 106 (98–113)      | 0.066        |
|                                          | 62 (57–68)          | 63 (58–69)        | 0.108        |
| <b>AT 36 GW</b>                          | 111 (103–119)       | 113 (105–122)     | 0.005        |
|                                          | 70 (65–76)          | 71 (65–78)        | 0.023        |
| <b>FASTING BLOOD GLUCOSE (mg/dL)</b>     |                     |                   |              |
| <b>AT 12 GW</b>                          | 81 (77–86)          | 81 (76–85)        | 0.075        |
| <b>AT 24 GW</b>                          | 86 (82–90)          | 84 (80–89)        | 0.002        |
| <b>AT 36 GW</b>                          | 77 (73–82)          | 76 (72–81)        | 0.050        |
| <b>HOMA-IR</b>                           |                     |                   |              |
| <b>AT 12 GW</b>                          | 0.6 (0.3–1.3)       | 0.6 (0.3–1.6)     | 0.195        |
| <b>AT 24 GW</b>                          | 1.7 (1.1–2.6)       | 1.6 (1.1–2.3)     | 0.06         |
| <b>AT 36 GW</b>                          | 1.6 (1.1–2.6)       | 1.6 (1.0–2.5)     | 0.235        |
| <b>HbA1C (%) AT 12 GW</b>                | 5.2 (5.0–5.3)       | 5.2 (5.0–5.3)     | 0.905        |
| <b>24 GW</b>                             | 5.0 (4.8–5.2)       | 4.9 (4.7–5.1)     | 0.000        |
| <b>36 GW</b>                             | 5.3 (5.1–5.5)       | 5.2 (5.0–5.4)     | 0.000        |
| <b>CHOLESTEROL (mg/dL) AT 12 GW</b>      | 174 (155–196)       | 171 (151–192)     | 0.068        |
| <b>24 GW</b>                             | 246 (217–275)       | 243 (219–270)     | 0.594        |
| <b>36 GW</b>                             | 277 (236–314)       | 265 (236–296)     | 0.014        |
| <b>TRIGLYCERIDES (mg/dL) AT 12 GW</b>    | 73 (59–99)          | 71 (56–96)        | 0.159        |
| <b>24 GW</b>                             | 149 (121–185)       | 152 (119–190)     | 0.601        |
| <b>36 GW</b>                             | 228 (190–277)       | 218 (174–270)     | 0.052        |
| <b>GDM AT 24-28 GW N (%)</b>             | 88 (23.9%)          | 202 (19.5%)       | 0.05         |
| <b>MEDICAL NUTRITION THERAPY</b>         | 53 (61.6%)          | 111 (57.8%)       | 0.202        |
| <b>INSULIN TREATMENT</b>                 | 45 (38.4%)          | 91 (42.2)         |              |
| <b>ECLAMPSIA</b>                         | 2 (0.7%)            | 15 (1.3%)         | 0.300        |
| <b>GESTATIONAL HYPERTENSION</b>          | 7 (2.3%)            | 37 (4.2%)         | 0.169        |
| <b>NB &gt;P90/&lt;P10</b>                | 13 (3.5%)/20 (5.4%) | 37(3.6%)/60(5.8%) | 0.551 /0.446 |
| <b>12 GW TSH <math>\mu</math>UI/ML</b>   | 1.9 (1.1–2.8)       | 1.9 (1.2–2.8)     | 0.642        |
| <b>FT4 PG/ML</b>                         | 8.5(7.7–9.4)        | 8.6 (7.8–9.5)     | 0.103        |
| <b>24 GW TSH <math>\mu</math>UI/ML</b>   | 1.7 (1.2–2.5)       | 1.9 (1.3–2.5)     | 0.266        |
| <b>FT4 PG/ML</b>                         | 6.8 (6.2–7.7)       | 6.9 (6.2–7.6)     | 0.578        |
| <b>36 GW TSH <math>\mu</math>UI/mL</b>   | 1.4 (0.9–2.1)       | 1.5 (1.0–2.1)     | 0.225        |
| <b>FT4 pg/mL</b>                         | 7.0 (6.3–7.8)       | 6.9 (6.2–7.8)     | 0.686        |
| <b>MEDAS SCORE</b>                       |                     |                   |              |
| <b>12 GW</b>                             | 5 (3;6)             | 5 (4; 6)          | 0.09         |
| <b>24 GW</b>                             | 5 (4;6)             | 6 (5; 7)          | 0.0000       |
| <b>36 GW</b>                             | 6 (5; 7)            | 6 (5; 8)          | 0.002        |
| <b>NUTRITION SCORE</b>                   |                     |                   |              |
| <b>12 GW</b>                             | 0 (–2; 3)           | 0 (–2; 3)         | 0.709        |
| <b>24 GW</b>                             | 1 (–1; 4)           | 3 (1; 5)          | 0.000        |
| <b>36 GW</b>                             | 4 (1; 7)            | 5 (2; 7)          | 0.002        |
| <b>PHYSICAL ACTIVITY SCORE</b>           |                     |                   |              |
| <b>12 GW</b>                             | –2 (–3; –1)         | –2 (–3; –1)       | 0.373        |
| <b>24 GW</b>                             | –2 (–2; –1)         | –2 (–2; –1)       | 0.798        |
| <b>36 GW</b>                             | –2 (–2; –1)         | –2 (–2; –1)       | 0.015        |

Data are Median (IQR) or number (%). blood pressure (BP); newborn (NB); Mediterranean Diet Adherence Screener (MEDAS). Physical Activity Score, (Walking daily (>5 days/week) Score 0: At least 30 min. Score +1, if >60 min. Score –1, if <30 min. Climbing stairs (floors/day, >5 days a week): Score 0, between 4 and 16; Score +1, >16; Score –1: <4).
